# Supplementary material for: Magnetic resonance imaging evidences of the impact of water sorption on hardwood capillary imbibition dynamics
Source: Springer Nature journal article supplement (doi:10.1007/s00226-018-1017-y), 2018-05-02
Supplement: MOESM1 [file 15734958]

**Magnetic resonance imaging evidences of the impact of water sorption on hardwood capillary imbibition dynamics**

M. Zhou, S. Caré, D. Courtier-Murias, P. Faure, S. Rodts, P. Coussot

Université Paris-Est, Laboratoire Navier (ENPC, IFSTTAR, CNRS), Champs sur Marne, France

**Appendix A:**

Figure 12 : Pore size distribution measured in transversal plane

**Appendix B: Edge effects**

It has been reported (Salin 2008a; Segerholm and Claesson 2008) that the surface layer of wood pieces could be more or less damaged during wooden sample preparations (sawing, polishing, …). This surface damage may open new capillary pathways during capillary rise and thus influences the imbibition dynamics of wood pieces, resulting in a higher water absorption rate (Salin 2008a). In order to appreciate such possible edge effects, we can look at the results obtained with a sample without any painting on the lateral surfaces.

**Figure 13** : Free water content profiles as measured by the multi-echo sequence (red square symbols) and estimated from 2D images (solid, dashed and dotted lines) in a sample without painting after 7 h of water imbibition. The inset (a) is the illustration of image slice selection, perpendicular to the transverse section (RT), in which the dark gray rectangle represents the sample and the light gray ones are the five MRI slices. The inset (b) shows two slices taken at the same time but in two different sections: (i) along the sample surface of wood sample and (ii) at the middle of sample’s thickness, as indicated in the inset (a). The lines in the main graph correspond to the normalized projection of NMR signal in different slices of the sample (see text): slice (i) (dashed line), slice (ii) (dotted line), all sample (black solid line).

**Figure 13** presents the water distribution obtained by multi-echo sequence of a sample without any painting protections after 7 h of imbibition. There is a large fraction of water absorbed near the sample’s bottom (over a distance about 2cm) and a small amount of water appears distributed along the rest of the sample up to the top. A peak of signal intensity can even be observed around the sample top (see **Figure 13**) as if the liquid tended to rapidly reach and accumulate in this region. In order to understand the formation of this surprising *U-shaped* water distribution we look at the distribution of water along the radial axis, in slices taken at different positions parallel to the RL plane, one containing the free surface of the sample (slice (i)) and the other situated in the middle of the sample (slice (ii)). It appears that, at the surface layer in the RL plane (slice (i)), water climbs all along the vertical direction and its intensity decreases gradually with the height. An accumulation of NMR signal in the form of a highly intensified horizontal line is clearly seen at the top of sample. In contrast, in the middle of the sample (see slice (ii) of **Figure 13**.b), water intensity is limited to the bottom of the sample, while two vertical lines of high intensity indicate that water spreads also rapidly along the free surfaces in the TL plane (perpendicular to the slice).

In order to better appreciate and compare the characteristics of these water distributions we can integrate the signal intensity in the 2D images. The validity of this technique may be checked by comparing the profiles either obtained by combining the information from images in all slices of the sample, or from a standard 1D profile: the two distributions are effectively quite similar (see **Figure 13**). Let us now compare the profiles obtained in the different slices. It appears (see **Figure 13**) that along the sample free surface the water amount decreases progressively from the bottom to the sample top (except for the peak at the top), while in the middle of the sample the penetration of water is almost limited to a region 2.5 cm above bottom. Both profiles present a peak at the top, suggesting that water can reach this region by any of the lateral surface layers and then possibly flow back down. This is in agreement with the suggestion that damaged surface layers could be formed during wood sample preparation, resulting in a faster penetration of liquid water in theses surface layers than that inside the sample (Salin 2008a). **Actually it is also possible that due to the complex rough structure of the wood surface water would climb faster through such a complex network partially open to air, rather different from a vessel structure.** For all the imbibition tests, the four lateral surfaces of the samples are sealed with a water-impermeable painting, so that such edge effects are eliminated. In that case the paint likely penetrates over a very limited distance, of the order of the vessel diameter.

**Appendix C: Correction of buoyancy force**

The variation of buoyancy force **referred to** the initial state writes , with the water density, the cross-section area of the wood sample and the variation of wetted height (see Figure 2). The apparent mass of water entered in the sample thus writes

|  | (10) |
| --- | --- |

where is the effective entered mass. On the other hand the variation of water level in the bath results from this mass entrance:

|  | (11) |
| --- | --- |

where is the cross-section area of the liquid bath. Using the value for deduced from equation (10), in the expression (11) we find the expression for the effective entered mass of water:

|  | (1) |
| --- | --- |

**Appendix D: Water imbibition curves with samples at different initial RH**

**Figure 14** : Standard water imbibition curves with different initial MC.

**Appendix E: 1D MRI profiles for an oven dried sample and a sample initially equilibrated at 97% RH**

**Figure 15** : Distribution of absorbed free water (solid lines) and bound water (short dash) content with a oven dried sample (60°C): (from left to right) 3 h after first contact with water, then every 6 h.

**Figure 16** : Distribution of absorbed free water (solid lines) and bound water (short dash) content with a sample initially equilibrated at 97% RH: (from left to right) 3 h after first contact with water, then every 6 h. Inset is a zoom of bound water content in the gradient region (for the sake of clarity, only 3,9,21,39,69 h are shown). Note that for this sample the heterogeneity (illustrated in **Figure 8**) explains the slightly more pronounced curved shape of the free water profiles. However, this does not change anything to our analysis, i.e. the bound water profiles still exhibit a plateau extending up to the maximum point reached by the free water front, and they extend farther at large values.

**Appendix F: Isothermal sorption kinetics from 53% to 97% RH**

**Figure 17** : Isothermal sorption kinetics of a poplar sample cut in cm3 when the sample is exposed to a humidity change from 53 to 97% RH.

**Figure 18**: Linearity between wood swelling and weight increase when the sample is exposed to a humidity change from 53 to 97% RH.
